# Supplementary material
Source: PubMed Central journal article supplement (PMC2838684)
Supplement: embor2009272-s1.pdf [file embor2009272-s1.pdf]

**Supplementary Information for:**

# **The iron-sulfur protein Rli1 functions in translation termination**

*Sohail Khoshnevis<sup>1,2</sup>, Thomas Gross<sup>2,3</sup>, Carmen Rotte<sup>1,2</sup>, Claudia Baierlein<sup>3</sup>, Ralf Ficner<sup>1,4</sup> and Heike Krebber<sup>3,4,5</sup>*

<sup>1</sup> Abteilung für Molekulare Strukturbiologie, Institut für Mikrobiologie und Genetik, GZMB, Georg-August-Universität Göttingen, Göttingen, Germany

<sup>2</sup> Equal contributions

<sup>3</sup> Institut für Molekularbiologie und Tumorforschung (IMT), Philipps-Universität Marburg, Marburg, Germany

<sup>4</sup> Equal last authors

<sup>5</sup> Corresponding author

Keywords: Translation termination, Rli1, eRF1, eRF3, Dbp5

# Figure S1

| Systematic name | Standard name | Description                                                                                         | Number of independent clones |
|-----------------|---------------|-----------------------------------------------------------------------------------------------------|------------------------------|
| YLR192C         | HCR1          | rRNA processing/translation initiation                                                              | 32                           |
| YBL092W         | RPL32         | protein component of the 60S ribosomal subunit                                                      | 2*                           |
| YBR143C         | SUP45         | polypeptide release factor eRF1 involved in translation termination                                 | 1                            |
| YHL015W         | RPS20         | protein component of the 40S ribosomal subunit                                                      | 1*                           |
| YMR143W         | RPS16         | protein component of the 40S ribosomal subunit                                                      | 1*                           |
| YDL031W         | DBP10         | putative ATP dependent helicase of the DEAD box protein family; involved in 60S ribosome biogenesis | 1                            |
| YLR043C         | TRX1          | protects cells against both oxidative and reductive stress                                          | 1                            |
| YOL016C         | CMK2          | calmodulin-dependent protein kinase                                                                 | 1                            |
| YLR044C         | PDC1          | pyruvate decarboxylase; glucose fermentation                                                        | 1                            |
| YOR047C         | STD1          | protein involved in control of glucose-regulated gene expression                                    | 1                            |
| YGR192C         | TDH3          | glycerinaldehyde-3 phosphate dehydrogenase; glycolysis                                              | 1                            |
| YOR383C         | FIT3          | mannoprotein                                                                                        | 1                            |
| YOR202W         | HIS3          | histidine biosynthesis                                                                              | 1                            |
| YBL036C         |               | alanine racemase activity                                                                           | 1                            |
| YDL097C         | RPN6          | essential, non-ATPase regulatory subunit of the 26S proteasome                                      | 1*                           |
| YBR085C         |               | function unknown                                                                                    | 1                            |
| undefined ORF   |               |                                                                                                     | 8                            |

# Figure S2

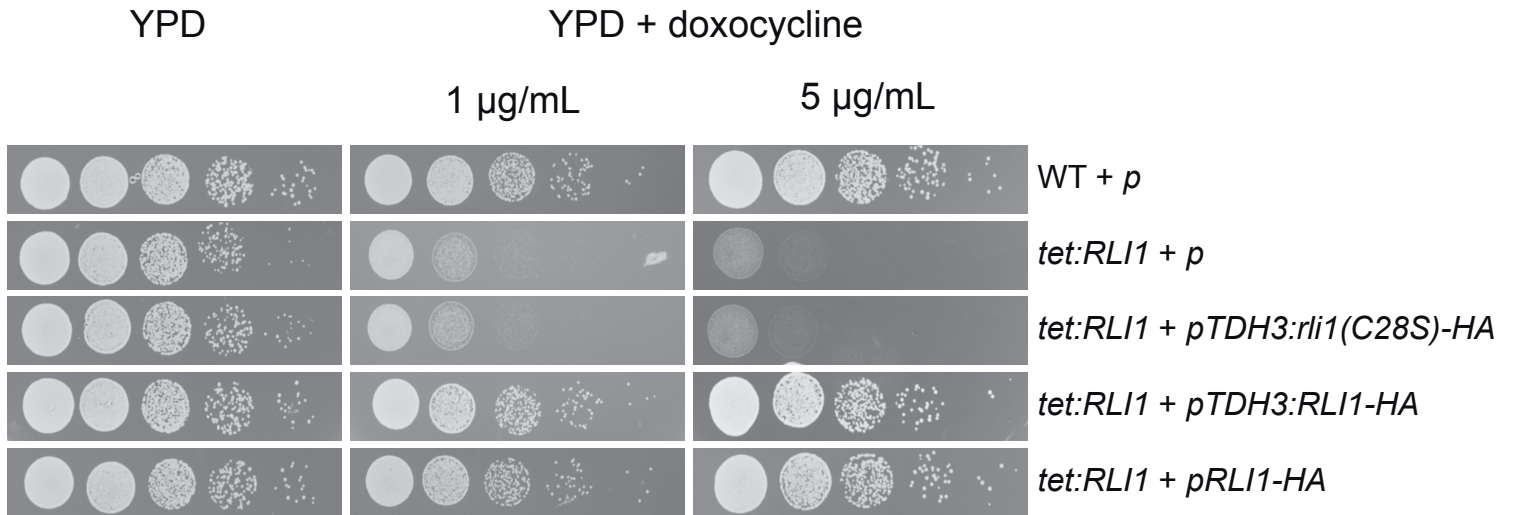

**A**

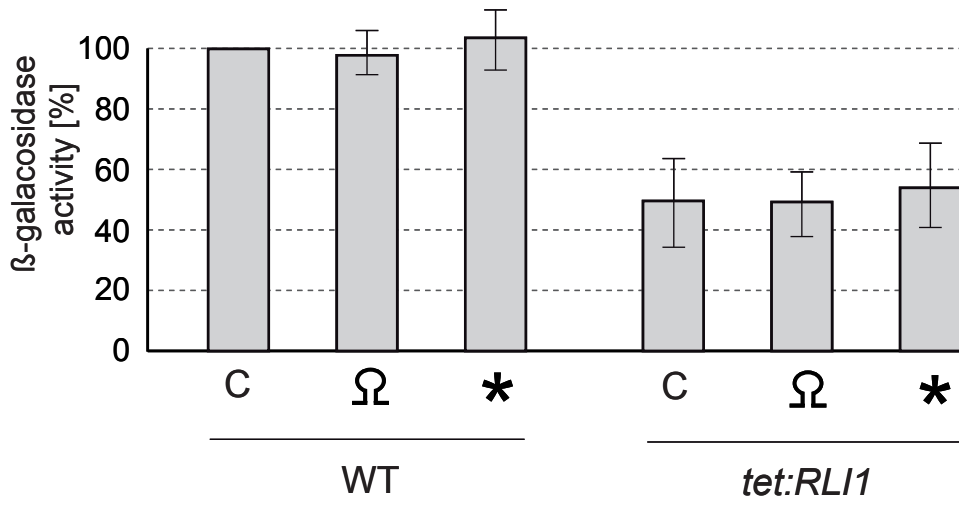

**B**

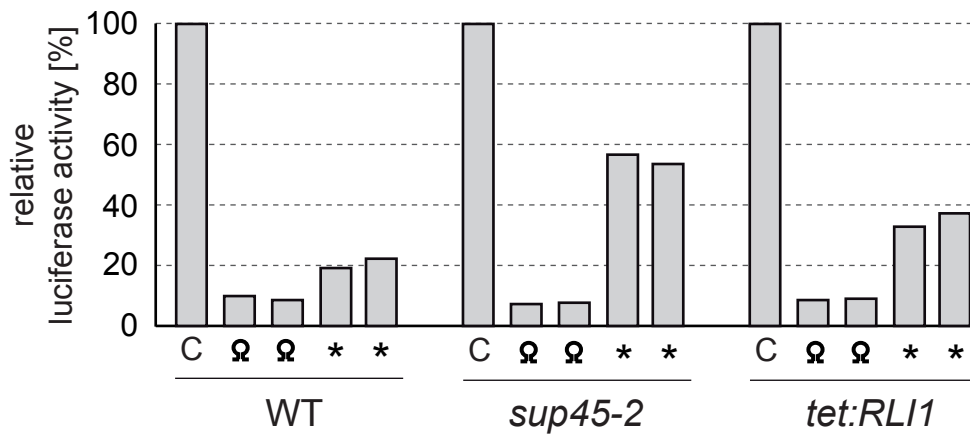

## A

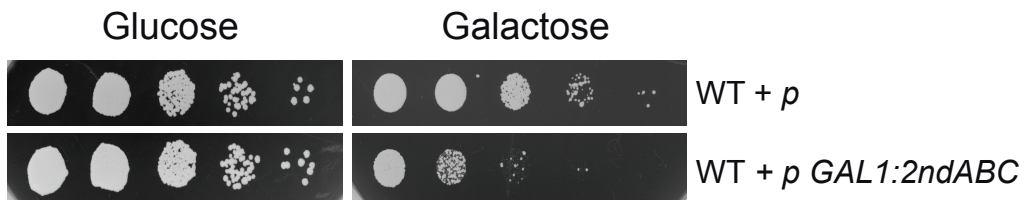

## B

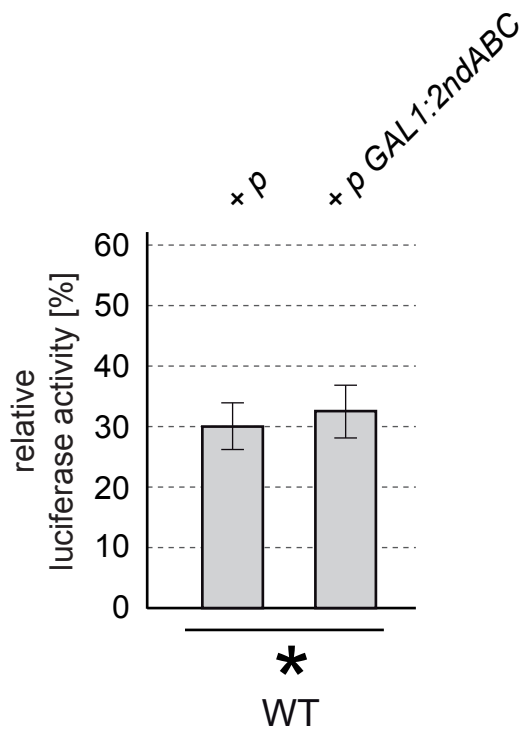

## FIGURE LEGENDS

**Fig. S1** | Summary of the results from the yeast-two-hybrid screen including the identified 55 proteins that gave strong yeast-two-hybrid interaction signals with the three reporter genes, *ADE2*, *HIS3*, and *lacZ*. \* denotes known false-positives in yeast-two-hybrid screens (Hengen, 1997).

**Fig. S2** | Downregulation of *RLII* is lethal, but can be suppressed by a functional copy of HA-tagged *RLII*. Serial dilutions of the indicated strains and plasmids are shown after growth at 25°C for three days on either full media (YPD) or YPD plates containing the indicated doxycycline concentrations in order to downregulate the *RLII* expression.

**Fig. S3** | Downregulation of *RLII* leads to defects in translation and to increased read through activity. **A** Comparison of the  $\beta$ -galactosidase activities in wildtype and downregulated *RLII* cells (*tet:RLII*) with three different vectors as depicted in Fig. 4A (C = control,  $\Omega$  = stem loop, \* = stop codon). The  $\beta$ -galactosidase activity of 1 OD<sub>600</sub> of wildtype cells (carrying the control vector C) is set to 100%. **B** Comparison of the luciferase activities of wildtype, *sup45-2* and downregulated *RLII* cells (*tet:RLII*) from two different examples of the stem loop containing construct ( $\Omega$ ) and the stop codon vector (\*). C = control.

**Fig. S4** | Overexpression of the 2<sup>nd</sup> ABC domain is toxic, but does not influence the stop codon recognition. (A) Overexpression of the 2<sup>nd</sup> ABC domain is toxic to wildtype cells. Wildtype cells carrying either an empty 2 $\mu$  vector (+ *p*) or a 2 $\mu$  plasmid encoding the 2<sup>nd</sup> ABC domain of *RLII*, driven from the strong *GALI* promoter were spotted in serial dilutions onto glucose or galactose containing plates and incubated for 2-3 days at 30°C. (B) Overexpression of the 2<sup>nd</sup> ABC domain does not influence proper stop codon recognition. Readthrough activities for wildtype cells are shown that carry either an empty vector (+ *p*) or a plasmid encoding the second ABC domain of *RLII*, driven from the strong *GALI* promoter. (Basal readthrough

activity in galactose containing medium is approximately 30%.) Results of seven independent experiments are shown.

## ADDITIONAL METHODS

### **Construction of GST- and pentaHis- fusion proteins and the *GAL:RLII* vectors.**

To construct GST-fusion proteins of *RLII*, oligonucleotides corresponding to the 5'-, and 3'-ends or internal sequences were used for PCR with yeast genomic DNA as template and digested with appropriate restriction enzymes corresponding to the terminal sequences (*Bam*HI or *Sma*I at the 5'-end and *Xho*I at the 3'-end) and subcloned into p GEX6P-3. To insert a polyhistidine tag (His-tag) into the ORF of *SUP45* or *HCR1*, oligonucleotides corresponding to the 5'-, and 3'-ends were amplified from yeast genomic DNA by PCR, introducing terminal *Bam*HI and *Xho*I sites, respectively. The *Bam*HI-*Xho*I fragments of the amplified DNA were subcloned into pET28b (*HCR1*) or pET30a (*SUP45*), respectively. Primer sequences are listed in TABLE S3.

DNA fragments containing either full-length *RLII* or the C-terminal ABC domain were PCR amplified using the primers listed in TABLE S3 and cloned into pHK907 (pME2795).

### **Yeast-two-hybrid library screen**

A DNA fragment containing either the complete ORF of *RLI1* or its different truncations were PCR-amplified using the oligonucleotides listed in table S3 and cloned into pGBKT7 using the Clontech Matchmaker system (Fields und Sternglanz, 1994; James *et al.*, 1996; James, 2001). This construct was used as bait for a two-hybrid screen of a yeast cDNA library fused to the *GAL4* activation domain in pGAD GH (kindly provided by Prof. D. Gallwitz (Max Planck Institute for Biophysical Chemistry Göttingen)). Purified DNA from the libraries was transformed into yeast strain AH109 carrying the bait plasmid pGBKT7-RLI. Transformants were plated onto the triple dropout plates (SD/-trp/-leu/-his). Transformants that grew on the triple dropout plates were rescreened under more stringent conditions on SD/-trp/-leu/-ade/-his dropout plates to test for *ADE2* expression and on X-gal- filter assays to test for lacZ expression. Plasmids were isolated from yeast transformants that were his+, ade+, and blue on X-gal and the inserts adjacent to the *GAL4* domain were sequenced.

### **Co-immunoprecipitation and protein purification**

Cells were grown at 25°C to a density of OD<sub>600</sub> 0.5-0.8 in the appropriate SD medium. If indicated a temperature shift to 37°C was done before 100-200 OD<sub>600</sub> of the cells were collected, washed once in ddH<sub>2</sub>O and resuspended in 600 µl of PBSMKT-buffer (137 mM NaCl, 5.7 mM KCl, 10 mM Na<sub>2</sub>HPO<sub>4</sub>, 2 mM KH<sub>2</sub>PO<sub>4</sub>, 2.5 mM MgCl<sub>2</sub>, 0.05-0.5% (v/v) Triton X-100). Yeast cells were transferred to microcentrifuge tubes, one cell volume of glass beads and protease inhibitor cocktail (Sigma-Aldrich (Nr. P8215) and Roche Applied Science



(Nr. 11873580001)) were added, and the cells were lysed by vigorous vortexing for 20 sec and 4.5°m/s using FastPrep®-24 (MP Biomedicals). After spinning for 5 min at 16.000 x g, the clarified supernatants were split into two equal portions (+/- addition of RNase A) and incubated for 2-4 h at 4°C with gentle agitation either with 10 µl of Protein G sepharose beads (Amersham Biosciences) or with 10 µl IgG sepharose beads (Amersham Biosciences), conjugated to HA-specific antibodies. In the RNase containing samples the enzyme was added to the PBSMKT-buffer to a final concentration of 200 µg/ml. The beads were washed five times with 1 ml PBSMKT-buffer by repeated low speed centrifugation (600 x g). Samples of the lysates, the final washes and the eluates were mixed with 2 x SDS sample loading buffer and separated on 10-15% (v/v) SDS-PAGEs.

### **GST-pulldowns**

Rosetta II (DE3) cells were transformed with pGEX6P3-Rli1 and either pET30a-Sup45 or pET28b-Hcr1. pGEX6P-3 alone or GST-PNC1 (pGEXTT) co-expressend with either His-Sup45p or His-Hcr1 served as negative controls. Overexpression was induced by 0.2 mM IPTG. Cells were grown at 16°C for 20 h, harvested and resuspended (50 mM Tris-HCl, pH 7.5, 200 mM NaCl, 2 mM 2-mercaptoethanol, 5% (v/v) glycerol, 0.2 mM PMSF, protease inhibitor mix). After cell lysis and centrifugation steps, the supernatant was diluted 1:1 with 50 mM Tris-HCl, pH 7.5, 2 mM 2-mercaptoethanol, 5% (v/v) glycerol, 0.2 mM PMSF, 2 mM MgCl<sub>2</sub>, 2 mM ATP and incubated with 100 µl of GSH-sepharose beads for 2 h at 4°C. After several washing steps (50 mM Tris-HCl, pH 7.5, 100 mM NaCl, 2 mM 2-mercaptoethanol, 5% (v/v) glycerol, 0.2 mM PMSF), beads were analysed on SDS page and by immunostaining. For immunostaining, a penta-His antibody (Quiagen) was employed as first antibody, followed by an alkaline-phosphatase conjugated secondary antibody (Dianova) and visualization of the His-tagged protein by alkaline phosphatase assay.

## SUPPLEMENTARY TABLES

TABLE S1. Yeast strains

| Number | Name        | Genotype                                                                                            | Source                          |
|--------|-------------|-----------------------------------------------------------------------------------------------------|---------------------------------|
| HKY35  | FY86        | <i>MATa ura3-52 leu2Δ1 trp1Δ63</i>                                                                  | Winston <i>et al.</i> , 1995    |
| HKY36  | FY23        | <i>MATα ura3-52 leu2Δ1 his3Δ200</i>                                                                 | Winston <i>et al.</i> , 1995    |
| HKY130 | CSY550      | <i>MATa ura3-52 leu2Δ1 trp1Δ63 rat8-2</i>                                                           | Snay-Hodge <i>et al.</i> , 1998 |
| HKY446 | MT552/8a    | <i>MATα ura3-1 his5-2 ade2-1 can1-100 sup45-2</i>                                                   | Stansfield <i>et al.</i> , 1997 |
| HKY473 |             | <i>MATa ura3 leu2Δ1 trp1Δ63 ade2-1 lys sup45-2</i>                                                  | Gross <i>et al.</i> , 2007      |
| HKY486 | SC0117      | <i>MATa ade2 arg4 leu2-3,112 trp1-289 ura3-52 SUP45:TAP:k.l.URA3</i>                                | Euroscarf                       |
| HKY487 | SC0134      | <i>MATa ade2 arg4 leu2-3,112 trp1-289 ura3-52 SUP35:TAP:k.l.URA3</i>                                | Euroscarf                       |
| HKY552 | 21-33G-D373 | <i>MATα pheA10 ade2-144,717 his7-1(UAA) lys9-A21(UAA) trp1-289(UAG) ura3-52 leu2-3,112 sup35-21</i> | Cosson <i>et al.</i> , 2002     |
| HKY940 |             | <i>MATa ade2-1 his3-11,15 leu2-3,112 ura3-1 can1-100 kanMX:TetO7:rli1</i>                           | Kispal <i>et al.</i> , 2005     |
| HKY955 |             | <i>MATa ade2-1 ura3-1 trp1 can1-100 kanMX:TetO7:rli1 sup45-2</i>                                    | this study                      |
| HKY999 |             | <i>MATα ade2 his leu2-3,112 ura3 trp kanMX:TetO7:rli1 sup35-21</i>                                  | this study                      |

TABLE S2. Plasmids

| Number | Name     | Features                                       | Source                            |
|--------|----------|------------------------------------------------|-----------------------------------|
| pHK86  | pRS314   | <i>CEN TRP1</i>                                | Christianson <i>et al.</i> , 1992 |
| pHK88  | pRS316   | <i>CEN URA3</i>                                | Christianson <i>et al.</i> , 1992 |
| pHK102 | pRS424   | $2\mu$ <i>TRP1</i>                             | Christianson <i>et al.</i> , 1992 |
| pHK104 | pRS426   | $2\mu$ <i>URA3</i>                             | Christianson <i>et al.</i> , 1992 |
| pHK606 | pAC 1798 | <i>CEN LEU2 lacZ-(HIV-1 stemloop)-luc</i>      | Stahl <i>et al.</i> , 1995        |
| pHK607 | pACTMV   | <i>CEN LEU2 lacZ-(UAG)-luc</i>                 | Stahl <i>et al.</i> , 1995        |
| pHK608 | pACTQ    | <i>CEN LEU2 lacZ-luc</i>                       | Stahl <i>et al.</i> , 1995        |
| pHK886 |          | <i>CEN URA3 RLII-HA</i>                        | Kispal <i>et al.</i> , 2005       |
| pHK888 |          | <i>CEN URA3 TDH3:RLII-HA</i>                   | Kispal <i>et al.</i> , 2005       |
| pHK891 |          | <i>CEN URA3 TDH3:rli1(C28S)-HA</i>             | Kispal <i>et al.</i> , 2005       |
| pHK903 |          | $2\mu$ <i>URA3 GAL1:RLII</i>                   | this study                        |
| pHK904 |          | $2\mu$ <i>URA3 GAL1:RLII-2<sup>nd</sup>ABC</i> | this study                        |
| pHK907 | p426GAL1 | $2\mu$ <i>URA3 GAL1</i>                        | Mumberg <i>et al.</i> , 1994      |

TABLE S3: Oligonucleotides

| Construct                                                                                 | Restriction site            | Oligonucleotide sequence (5' – 3') forward / reverse                                            |
|-------------------------------------------------------------------------------------------|-----------------------------|-------------------------------------------------------------------------------------------------|
| pGADT7_RLI1/<br>pGBKT7_RLI1                                                               | <i>Nde</i> I, <i>Xho</i> I  | ACGACAGACCC <u>CATATG</u> AGTGATAAAAAACAGTCG/<br>CATA <u>CTCGAG</u> TAAATACCGGTGTTATCCAAGAAA    |
| pGADT7_SUP45 /<br>pGBKT7_SUP45                                                            | <i>Nde</i> I, <i>Xho</i> I  | GGAATT <u>CATATG</u> GATAACGAGGTTGAAAAAATAT/<br>ACCG <u>CTCGAG</u> AATGAAATCATAGTCGGATCCTT      |
| pGADT7_DBP10                                                                              | <i>Nde</i> I, <i>Xho</i> I  | GGAATT <u>CATATG</u> GCGAGGCGTGCAGAAA/<br>ACCG <u>CTCGAG</u> CTAAAATTTACGCTTTTTGGAAGG           |
| pME2795_RLI1-2 <sup>nd</sup> ABC<br>domain (pHK904)                                       | <i>Sma</i> I, <i>Xho</i> I  | TTCCCCGGGAATGACTGAAGCTTTACAATTTAGAATAGC/<br>CATA <u>CTCGAG</u> TAAATACCGGTGTTATCCAAGAAA         |
| pGBKT7_RLI1-2 <sup>nd</sup> ABC<br>domain /<br>pGEX6P-1_RLI-2 <sup>nd</sup> ABC<br>domain | <i>Nde</i> I, <i>Xho</i> I  | GGAATT <u>CATATG</u> ACTGAAGCTTTACAATTTAGAATAGC/<br>CATA <u>CTCGAG</u> TAAATACCGGTGTTATCCAAGAAA |
| pGBKT7_HCR1/<br>pET22b_HCR1                                                               | <i>Nde</i> I, <i>Xho</i> I  | GGGAATTC <u>CATATG</u> TCTTGGGACGACGAAGCTA/<br>GCC <u>CTCGAG</u> TTACATAAAGTCGTCATCACCAAGTTC    |
| pET30a_SUP45                                                                              | <i>Bam</i> HI, <i>Xho</i> I | ACGCGGATCCATGGATAACGAGGTTGAAAAAATAT/<br>ACCG <u>CTCGAG</u> AATGAAATCATAGTCGGATCCTT              |

## **ADDITIONAL REFERENCES**

- Fields S, Sternglanz R: (1994). The two-hybrid system: an assay for protein-protein interactions. *Trends Genet*, 10(8): 286-92.
- James P: (2001). Yeast two-hybrid vectors and strains. *Methods Mol Biol*, 177: 41-84.
- James P, Halladay J, Craig EA: (1996). Genomic libraries and a host strain designed for highly efficient two-hybrid selection in yeast. *Genetics*, 144(4): 1425-36.
- Hengen P: (1997) False positives from the yeast two-hybrid system. *Trends Biochem Sci*, 22 (1): 33-4.
- Mumberg D, Müller R, Funk M: (1994). Regulatable promoters of *Saccharomyces cerevisiae*: comparison of transcriptional activity and their use for heterologous expression. *Nucleic Acids Res*, 22(25): 5767-5768.
